# Supplementary material
Source: publisher figshare collection journal article supplement (https://scielo.figshare.com/articles/dataset/_/5667475)
Supplement: Supplementary file 1 [file Table_1.xls]

## Sheet: Table_1
<b>Groups (<em>n</em> = 11)</b>	<b>Initial weight (mg)</b>	<b>Final weight (mg)</b>	<b>Amount of blood ingested (µL)</b>	<b>Estimated number of parasites ingested (BT)</b>
RR + PR2256 (TcII)	32 ± 12	214 ±79<sup>a</sup>	182 ± 73<sup>b</sup>	10,202 ± 4,103<sup>c</sup>
RR + AM14 (TcIV)	30 ± 5	195 ± 46<sup>a</sup>	149 ± 62<sup>b</sup>	8,334 ± 3,488<sup>c</sup>
TS + PR2256 (TcII)	86 ± 33	130 ± 33<sup>a</sup>	44 ± 27	2,464 ± 1,488
TS + AM14 (TcIV)	48 ± 16	69 ± 21<sup>a</sup>	21 ± 10	1,182 ± 576
