# Supplementary material
Source: publisher figshare collection journal article supplement (https://scielo.figshare.com/articles/dataset/_/5667475)
Supplement: Supplementary file 2 [file Table_2.xls]

## Sheet: Table_2
<b></b>	<b>Number of positive insects/Total number of insect examined (%)</b>					<b></b>
Groups (<em>n</em>=11)	Fresh examination	Global count	Differential count	PCR	INF
RR + TcII	0/11 (0.0)	0/11 (0.0)	2/11 (18.9)	8/9 (88.9)<sup>a</sup>	8/11(72.7)
RR + TcIV	9/11 (81.8)	10/11 (90.9)	10/11 (90.9)	1/1 (100.0)	11/11 (100.0)*
TS + TcII	2/11 (18.9)	2/11 (18.9)	3/11 (27.3)	6/8 (75.0)<sup>a</sup>	9/11 (81.8)*
TS + TcIV	0/11 (0.0)	0/11 (0.0)	0/11 (0.0)	4/11 (36.4)<sup>a</sup>	4/11 (36.4)#
Total	11/44 (25.0)	12/44 (27.3)	15/44 (34.1)	22/32 (75.1)	32/44 (72.7)
